# Supplementary figures and images for: Eight Americas: Investigating Mortality Disparities across Races, Counties, and Race-Counties in the United States
Source: PLOS journal article supplement (doi:10.1371/journal.pmed.0030260), 2006-09-11

**Figure S-2:** Geographic locations for Americas 6, 7, and 8

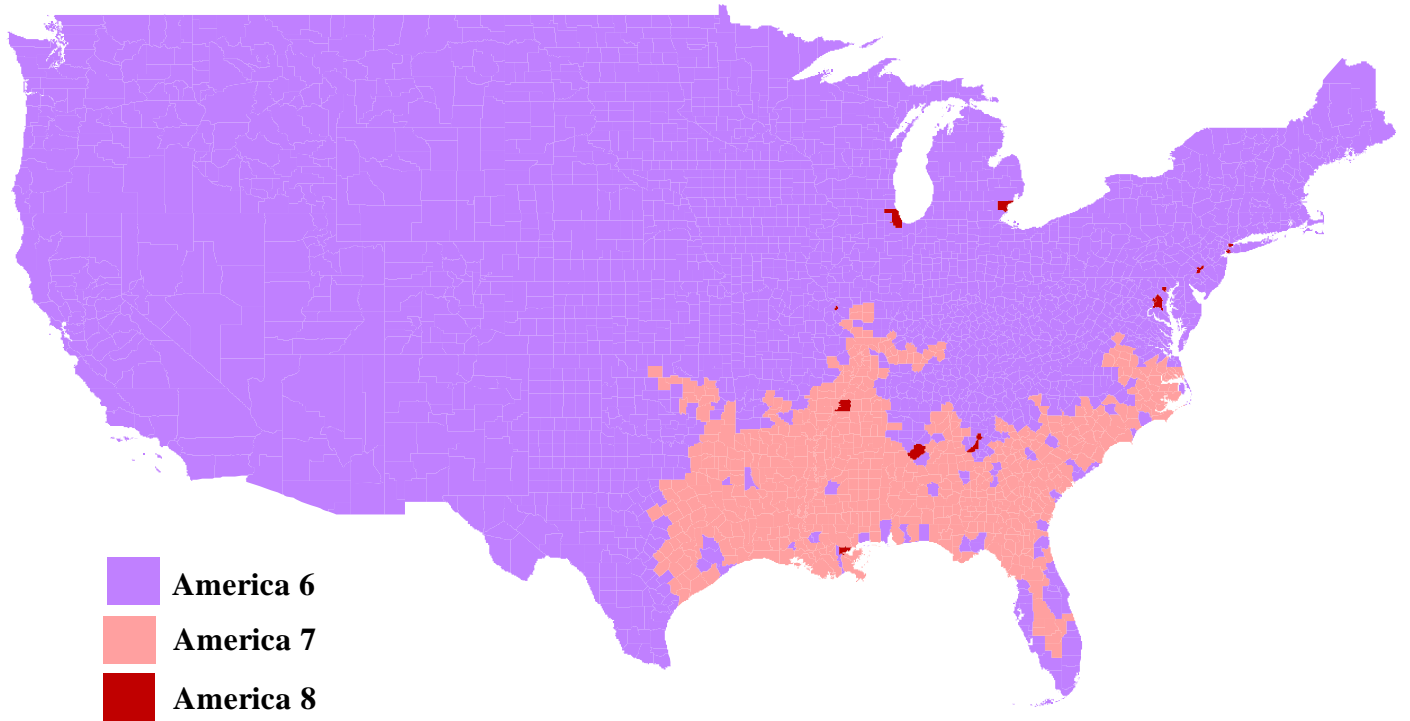

Supplement: S2 (10.1371/journal.pmed.0030260.s002) [file journal.pmed.0030260.s002]
